# Supplementary material for: A case report of acute interstitial nephritis caused by cotton phenol
Source: Research Square preprint supplement (doi:10.21203/rs.3.rs-5693104/v1), 2025-04-17
Supplement: Supplementary file 1 [file a22cbe4c39402715c18c3af3.pdf]

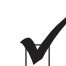

| Topic                               | Item       | Checklist item description                                                                                   | Reported on Line                                                    |
|-------------------------------------|------------|--------------------------------------------------------------------------------------------------------------|---------------------------------------------------------------------|
| <b>Title</b>                        | <b>1</b>   | The diagnosis or intervention of primary focus followed by the words “case report” .....                     | Line1-2                                                             |
| <b>Key Words</b>                    | <b>2</b>   | 2 to 5 key words that identify diagnoses or interventions in this case report, including "case report" ..... | Line53                                                              |
| <b>Abstract<br/>(no references)</b> | <b>3a</b>  | Introduction: What is unique about this case and what does it add to the scientific literature? .....        | Line29-32                                                           |
|                                     | <b>3b</b>  | Main symptoms and/or important clinical findings. ....                                                       | Line33-35                                                           |
|                                     | <b>3c</b>  | The main diagnoses, therapeutic interventions, and outcomes .....                                            | Line41-45                                                           |
|                                     | <b>3d</b>  | Conclusion—What is the main “take-away” lesson(s) from this case? .....                                      | Line46-51                                                           |
| <b>Introduction</b>                 | <b>4</b>   | One or two paragraphs summarizing why this case is unique <b>(may include references)</b> .....              | Line68-70                                                           |
| <b>Patient Information</b>          | <b>5a</b>  | De-identified patient specific information.....                                                              | Line77                                                              |
|                                     | <b>5b</b>  | Primary concerns and symptoms of the patient .....                                                           | Line77-82                                                           |
|                                     | <b>5c</b>  | Medical, family, and psycho-social history including relevant genetic information .....                      | Line85-89                                                           |
|                                     | <b>5d</b>  | Relevant past interventions with outcomes.....                                                               | Line82-83                                                           |
| <b>Clinical Findings</b>            | <b>6</b>   | Describe significant physical examination (PE) and important clinical findings.....                          | Line89-139/Figure1-5                                                |
| <b>Timeline</b>                     | <b>7</b>   | Historical and current information from this episode of care organized as a timeline .....                   | Line162-163/Figure6                                                 |
| <b>Diagnostic<br/>Assessment</b>    | <b>8a</b>  | Diagnostic testing (such as PE, laboratory testing, imaging, surveys). ....                                  | Line89-139/Figure1-5                                                |
|                                     | <b>8b</b>  | Diagnostic challenges (such as access to testing, financial, or cultural) .....                              | Line169-201                                                         |
|                                     | <b>8c</b>  | Diagnosis (including other diagnoses considered) .....                                                       | Line201-213                                                         |
|                                     | <b>8d</b>  | Prognosis (such as staging in oncology) where applicable.....                                                | Line165-166                                                         |
| <b>Therapeutic<br/>Intervention</b> | <b>9a</b>  | Types of therapeutic intervention (such as pharmacologic, surgical, preventive, self-care) .....             | Line141-166/Figure6                                                 |
|                                     | <b>9b</b>  | Administration of therapeutic intervention (such as dosage, strength, duration) .....                        | Line141-166                                                         |
|                                     | <b>9c</b>  | Changes in therapeutic intervention (with rationale) .....                                                   | Line141-166                                                         |
| <b>Follow-up and<br/>Outcomes</b>   | <b>10a</b> | Clinician and patient-assessed outcomes (if available).....                                                  | Not applicable                                                      |
|                                     | <b>10b</b> | Important follow-up diagnostic and other test results.....                                                   | Not applicable                                                      |
|                                     | <b>10c</b> | Intervention adherence and tolerability (How was this assessed?).....                                        | Not applicable                                                      |
|                                     | <b>10d</b> | Adverse and unanticipated events.....                                                                        | Not applicable                                                      |
| <b>Discussion</b>                   | <b>11a</b> | A scientific discussion of the strengths AND limitations associated with this case report.....               | Line267-269                                                         |
|                                     | <b>11b</b> | Discussion of the relevant medical literature <b>with references</b> .....                                   | Line218-254                                                         |
|                                     | <b>11c</b> | The scientific rationale for any conclusions (including assessment of possible causes) .....                 | Line201-217/267-269                                                 |
|                                     | <b>11d</b> | The primary “take-away” lessons of this case report (without references) in a one paragraph conclusion.....  | Line270-279                                                         |
| <b>Patient Perspective</b>          | <b>12</b>  | The patient should share their perspective in one to two paragraphs on the treatment(s) they received .....  | Not applicable                                                      |
| <b>Informed Consent</b>             | <b>13</b>  | Did the patient give informed consent? Please provide if requested.....                                      | Yes <input checked="" type="checkbox"/> No <input type="checkbox"/> |
